# Supplementary material
Source: PubMed Central journal article supplement (PMC6125516)
Supplement: zac009187415s1.pdf [file zac009187415s1.pdf]

1 **Table S1: Primers used in this study**

| Primer        | Goal                           | Sequence (5'-3')                 | Reference  |
|---------------|--------------------------------|----------------------------------|------------|
| pmrCAB-seq1-F | Sequencing pmrCAB              | ATTAGGTTTCATGATGGGTT             | (1)        |
| pmrCAB-seq1-R | Sequencing pmrCAB              | TCCGTATTTAATTATTTTACCTT          | (1)        |
| pmrCAB-seq2-F | Sequencing pmrCAB              | AGCATCGGCAATAAATTG               | (1)        |
| pmrCAB-seq2-R | Sequencing pmrCAB              | TCTGGTTTTAAATGTTGAACA            | (1)        |
| pmrCAB-seq3-F | Sequencing pmrCAB              | TTAATGAATAATGCACTTTTATG          | (1)        |
| pmrCAB-seq3-R | Sequencing pmrCAB              | ATAGTTATGATAATAACAATCG           | (1)        |
| rpoB-F        | Real-time PCR                  | TCCGCACGTAAAGTAGGAAC             | (2)        |
| rpoB-R        | Real-time PCR                  | ATGCCGCCTGAAAAAGTAAC             | (2)        |
| pmrA-F        | Real-time PCR                  | TGGTATGCAAGTTTTGAAGCA            | (1)        |
| pmrA-R        | Real-time PCR                  | GTAATTGATCTCGAGCAGAAATAAT        | (1)        |
| pmrB-F        | Real-time PCR                  | TGCTTACAAGGTTGCACTTCA            | (1)        |
| pmrB-R        | Real-time PCR                  | TTCTTTCCGCTAAATACTTCATTT         | (1)        |
| pmrC-F        | Real-time PCR                  | CATTTGGCTAGGTGCAATTTT            | this study |
| pmrC-R        | Real-time PCR                  | AACCGCATAATAGGTAGCAACAA          | this study |
| eptA-F        | Real-time PCR                  | TTTGCTTTTATCTATCTGGCTAGG         | this study |
| eptA-R        | Real-time PCR                  | TGAAAAATTAAATTATATGCCGCTATT      | this study |
| TelR-SphI-F   | cloning TelR in pABBR          | CGACGAGCATGCCGAGCTCGAATTGGGGATCT | this study |
| TelR-SphI-R   | cloning TelR in pABBR          | CGACGAGCATGCGCTCAAGCTTCCCGGGTAC  | this study |
| pmrAB-EcoRI-F | cloning pmrAB in pABBR-TelR    | CGACGAGAATTCAATTAGCCAGTCACCGCGAA | this study |
| pmrAB-SpeI-R  | cloning pmrAB in pABBR-TelR    | CGACGAACTAGTGTTTCATGATGGGTTGGGCG | this study |
| pABBR-TelR-F  | screening insert in pABBR-TelR | AGGATGACGATGAGCGCATT             | this study |
| pABBR-TelR-R  | screening insert in pABBR-TelR | TGCCACCTGACGTCCAAAAA             | this study |

2

3

4 **References**

- 5 1. Lesho E, Yoon EJ, McGann P, Snesrud E, Kwak Y, Milillo M, Onmus-Leone F, Preston  
6 L, St Clair K, Nikolich M, Viscount H, Wortmann G, Zapor M, Grillot-Courvalin C, Courvalin  
7 P, Clifford R, Waterman PE. 2013. Emergence of colistin-resistance in extremely drug-resistant  
8 *Acinetobacter baumannii* containing a novel pmrCAB operon during colistin therapy of wound  
9 infections. *J Infect Dis* 208:1142-51.

10 2. Coyne S, Rosenfeld N, Lambert T, Courvalin P, Perichon B. 2010. Overexpression of  
11 resistance-nodulation-cell division pump AdeFGH confers multidrug resistance in  
12 *Acinetobacter baumannii*. *Antimicrob Agents Chemother* 54:4389-93.

13
